# Supplementary material for: Impact of Portal Vein Thrombosis on Endoscopic Variceal Band Ligation in Liver Cirrhosis
Source: Hindawi journal article supplement (doi:10.1155/2021/9929333), 2021-05-21
Supplement: f1 [file 9929333.f1.doc]

**Supplementary Table 1.Anatomico-Functional Classification of Portal Vein Thrombosis in Cirrhosis**

| Site pf PVT-(Type 1,2a,2b,3) |
| --- |
| Type 1: Only trunk |
| Type 2: Only branch:2a,one branch; 2b, both branches |
| Type 3:Trunk and branches |
| Degree of portal venous system occlusion (O,NO) |
| O:Occlusive: No flow visible in PV lumen on imaging/Doppler study |
| NO: Nonocclusive: Flow visible in PV lumen through imaging/Doppler study |
| Duration and Presentation (R,C) |
| R:Recent (first time detected in previously patent PV, presence of hyperdense thrombus on imaging, absent or limited collateral circulation, dilated PV at the site of occlusion) |
| Asympatomatic: (As) |
| Symptomatic: (S),Acute PVT features (with or without ABI) |
| Ch: Chronic (no hyperdense thrombus; previously diagnosed PVT on follow-up, portal cavernoma and clinical features of PHT)  Asymptomatic |
| Symptomatic: features pf portal vein thrombosis (with or without PHT) |
| Extent of PV system occlusion (S, M, SM) |
| Splenic vein, mesenteric vein or both |
| Type and presence of underlying liver disease |
| Cirrhotic, noncirrhotic liver disease, post-liver transplant, HCC, local malignancies, and associated conditions |
|  |

ABI,acute bowel ischema; HCC, hepatocellular carcinoma; IMV, inferior mesenteric vein; PHT, portal hypertension; PVT, portal vein thrombosis; PV,poratal vein; SV, splenic vein.

(Queto from Sarin et al [6] and adjust according to format
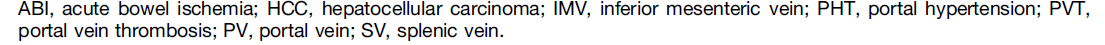

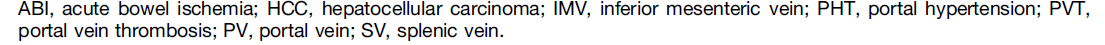

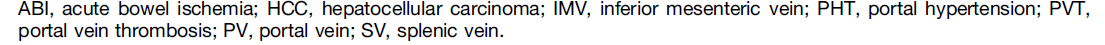

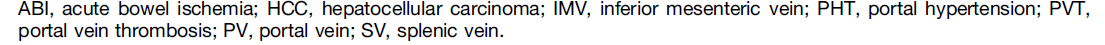

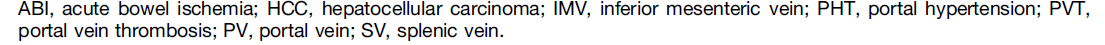

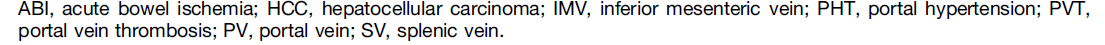

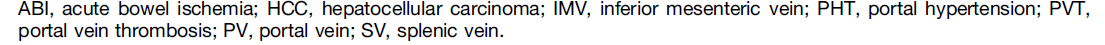
.)
